# Supplementary material
Source: publisher figshare collection journal article supplement (https://acs.figshare.com/ndownloader/files/4538368)
Supplement: Supplementary file 1 [file 4538368]

## Supporting Information to:

## Complexation of Nitrous Oxide by Frustrated Lewis Pairs

Edwin Otten, Rebecca C. Neu and Douglas W. Stephan

*Department of Chemistry, University of Toronto, 80 St. George Street,  
Toronto, Ontario, Canada, M5S 3H6*

**General Considerations.** All manipulations were carried out under an atmosphere of dry, O<sub>2</sub>-free N<sub>2</sub> employing standard Schlenk-line and glovebox techniques. Solvents (pentane, hexanes, CH<sub>2</sub>Cl<sub>2</sub>) were dried by employing a Grubbs-type column system (Innovative Technology), degassed and stored under N<sub>2</sub>; cyclohexane was distilled under N<sub>2</sub> from Na/benzophenone; bromobenzene was vacuum transferred from CaH<sub>2</sub> and stored under N<sub>2</sub>. Deuterated solvents were vacuum transferred from CaH<sub>2</sub> (CD<sub>2</sub>Cl<sub>2</sub>; C<sub>6</sub>D<sub>5</sub>Br). <sup>t</sup>Bu<sub>3</sub>P (Strem Chemicals), N<sub>2</sub>O (Sigma-Aldrich; 99%) and <sup>15</sup>N<sub>2</sub>O (Cambridge Isotope Laboratories; 99.9%, 98.8% <sup>15</sup>N enriched) were used as received. The reagents PhB(C<sub>6</sub>F<sub>5</sub>)<sub>2</sub><sup>1</sup> and <sup>t</sup>Bu<sub>3</sub>P=O<sup>2</sup> were prepared according to literature procedures; <sup>t</sup>Bu<sub>3</sub>P=O was recrystallized from pentane at -30 °C. <sup>1</sup>H, <sup>11</sup>B, <sup>13</sup>C, <sup>19</sup>F, <sup>31</sup>P and <sup>15</sup>N NMR spectra were recorded at 25 °C on a Varian NMR System 400 MHz or Bruker Avance III 400 MHz spectrometer, and were referenced using (residual) solvent resonances relative to SiMe<sub>4</sub> (<sup>1</sup>H, <sup>13</sup>C), or relative to an external standard (<sup>11</sup>B: (Et<sub>2</sub>O)BF<sub>3</sub>; <sup>19</sup>F: CFCF<sub>3</sub>; <sup>31</sup>P: 85% H<sub>3</sub>PO<sub>4</sub>; <sup>15</sup>N: NH<sub>3</sub>(l) via the <sup>15</sup>N resonance of 90% formamide in DMSO-*d*<sub>6</sub> at 112 ppm).<sup>3</sup> Chemical shifts are reported in ppm and coupling constants as scalar values in Hz. Infrared spectra were recorded on a Perkin-Elmer Spectrum One FT-IR spectrometer; samples were prepared as thin films on KBr plates by evaporation of a CH<sub>2</sub>Cl<sub>2</sub> solution. Photolysis experiments were performed in conventional glass J. Young NMR tubes using a quartz mercury arc lamp (ACE Glass) equipped with water cooling. Combustion analyses were performed in house employing a Perkin-Elmer CHN Analyzer.

**<sup>t</sup>Bu<sub>3</sub>P(N<sub>2</sub>O)B(C<sub>6</sub>F<sub>5</sub>)<sub>3</sub> (1).** A solution of B(C<sub>6</sub>F<sub>5</sub>)<sub>3</sub> (200 mg, 0.391 mmol) and <sup>t</sup>Bu<sub>3</sub>P (79 mg, 0.391 mmol) in 5 mL of C<sub>6</sub>H<sub>5</sub>Br was allowed to sit under an atmosphere of N<sub>2</sub>O for a day, resulting in the precipitation of a colorless product. Hexane (15 mL) was stirred in and the precipitate was allowed to settle. The supernatant was decanted and the white residue was recrystallized by diffusion of hexane into a CH<sub>2</sub>Cl<sub>2</sub> solution to give 225 mg of **1** as white microcrystalline material (0.296 mmol, 76%). <sup>1</sup>H NMR (400 MHz, CD<sub>2</sub>Cl<sub>2</sub>, 25 °C) δ 1.46 (d, *J*<sub>PH</sub> = 14.5). <sup>31</sup>P{<sup>1</sup>H} NMR (162 MHz, CD<sub>2</sub>Cl<sub>2</sub>, 25 °C) δ 68.5 (s). <sup>19</sup>F NMR (377 MHz, CD<sub>2</sub>Cl<sub>2</sub>, 25 °C) δ -133.8 (dd, <sup>1</sup>*J*<sub>FF</sub> = 23.9, <sup>2</sup>*J*<sub>FF</sub> = 6.9, 2F, *o*-F), -160.3 (t, *J* = 20.2, 1F, *p*-F), -166.0 (m, 2F, *m*-F). <sup>11</sup>B NMR (128 MHz, CD<sub>2</sub>Cl<sub>2</sub>, 25 °C) δ 0.4. <sup>13</sup>C NMR (101 MHz, CD<sub>2</sub>Cl<sub>2</sub>, 25 °C) δ 148.5 (d, *J*<sub>FC</sub> = 240, *o*-C<sub>6</sub>F<sub>5</sub>), 139.9 (d, *J*<sub>FC</sub> = 246, *p*-C<sub>6</sub>F<sub>5</sub>), 137.5 (d, *J*<sub>CF</sub> = 248, *m*-CF), 121.2 (br, *ipso*-C<sub>6</sub>F<sub>5</sub>), 41.8 (d, *J*<sub>PC</sub> = 29, PCMe<sub>3</sub>), 29.7 (PCMe<sub>3</sub>). Anal. Calcd for C<sub>30</sub>H<sub>27</sub>BF<sub>15</sub>N<sub>2</sub>OP: C, 47.52; H, 3.59; N, 3.69. Found: C, 47.78; H, 3.96; N, 3.47.

**${}^t\text{Bu}_3\text{P}({}^{15}\text{N}_2\text{O})\text{B}(\text{C}_6\text{F}_5)_3$  (**1- ${}^{15}\text{N}$** ).** An NMR tube containing a solution of  $\text{B}(\text{C}_6\text{F}_5)_3$  (25 mg, 0.049 mmol) and  ${}^t\text{Bu}_3\text{P}$  (10mg, 0.049 mmol) in 0.5 mL  $\text{C}_6\text{D}_5\text{Br}$  was degassed and backfilled with  $\sim 0.9$  bar of  ${}^{15}\text{N}_2\text{O}$ . After standing overnight, the product was precipitated by addition of hexanes. The white precipitate was dried *in vacuo* and dissolved in 0.5 mL of  $\text{CD}_2\text{Cl}_2$ . NMR analysis was consistent with formation of **1- ${}^{15}\text{N}$** .  ${}^1\text{H}/{}^{19}\text{F}$  NMR spectra are identical to **1**.  ${}^{31}\text{P}\{{}^1\text{H}\}$  NMR (162 MHz,  $\text{CD}_2\text{Cl}_2$ , 25 °C)  $\delta$  68.5 (dd,  ${}^1J_{\text{PN}} = 58.7$ ,  ${}^2J_{\text{PN}} = 19.6$ ).  ${}^{15}\text{N}$  NMR (40.6 MHz,  $\text{CD}_2\text{Cl}_2$ , 25 °C)  $\delta$  566.6 (dd,  ${}^2J_{\text{PN}} = 19.6$ ,  ${}^1J_{\text{NN}} = 15.6$ , *NNO*), 381.7 (dd,  ${}^1J_{\text{PN}} = 58.7$ ,  ${}^1J_{\text{NN}} = 15.6$ , *NNO*).

**${}^t\text{Bu}_3\text{P}(\text{N}_2\text{O})\text{B}(\text{C}_6\text{F}_5)_2\text{Ph}$  (**2**).** A 50 mL schlenk tube was charged with  $\text{PhB}(\text{C}_6\text{F}_5)_2$  (0.119 g, 0.282 mmol) and  ${}^t\text{Bu}_3\text{P}$  (0.057 g, 0.282 mmol) in bromobenzene (5 mL). The colourless solution was subjected to 3 freeze-pump-thaw cycles using liquid nitrogen to degas the solution. The sample was exposed to a continuous flow of  $\text{N}_2\text{O}$  for a period of 1 minute. The solution was stirred at room temperature for 12 hours. At this time, the solution was clear and colorless. Pentane (10 mL) was added precipitating a white solid. The solid was isolated by filtration, washed with pentane (3 x 5 mL) and dried *in vacuo* for 2 hours. Yield: 0.144 g (76%). Crystals suitable for X-ray diffraction were grown from a layered dichloromethane/cyclohexane solution at 25 °C.  ${}^1\text{H}$  NMR (400 MHz,  $\text{CD}_2\text{Cl}_2$ , 25 °C)  $\delta$  7.40 (d, 2H,  ${}^3J_{\text{HH}} = 7$  Hz, *o*- $\text{C}_6\text{H}_5$ ), 7.17 (t, 2H,  ${}^3J_{\text{HH}} = 8$  Hz, *m*- $\text{C}_6\text{H}_5$ ), 7.09 (t, 1H,  ${}^3J_{\text{HH}} = 8$  Hz, *p*- $\text{C}_6\text{H}_5$ ), 1.44 (d, 27H,  ${}^3J_{\text{HP}} = 14$  Hz,  $\text{P}\{\text{C}(\text{CH}_3)_3\}$ ).  ${}^{11}\text{B}\{{}^1\text{H}\}$  NMR ( $\text{CD}_2\text{Cl}_2$ )  $\delta$  3.27 (s).  ${}^{13}\text{C}\{{}^1\text{H}\}$  NMR ( $\text{CD}_2\text{Cl}_2$ )  $\delta$  148.25 (br d,  ${}^1J_{\text{CF}} = 240$  Hz, *o*- $\text{C}_6\text{F}_5$ ), 139.68 (br d,  ${}^1J_{\text{CF}} = 218$  Hz, *p*- $\text{C}_6\text{F}_5$ ), 137.23 (br d,  ${}^1J_{\text{CF}} = 226$  Hz, *m*- $\text{C}_6\text{F}_5$ ), 132.31 (s, *p*- $\text{C}_6\text{H}_5$ ), 127.35 (s, *o*- $\text{C}_6\text{H}_5$ ), 125.77 (s, *m*- $\text{C}_6\text{H}_5$ ), 41.64 (d,  ${}^1J_{\text{CP}} = 30$  Hz,  $\text{P}\{\text{C}(\text{CH}_3)_3\}$ ), 29.71 (s,  $\text{CH}_3$ ).  ${}^{19}\text{F}$  NMR ( $\text{CD}_2\text{Cl}_2$ ):  $\delta$  -131.87 (dd, 4F,  ${}^3J_{\text{FF}} = 25$  Hz,  ${}^4J_{\text{FF}} = 9$  Hz, *o*- $\text{C}_6\text{F}_5$ ), -161.71 (t, 2F,  ${}^3J_{\text{FF}} = 20$  Hz, *m*- $\text{C}_6\text{F}_5$ ), -166.45 (td, 4F,  ${}^3J_{\text{FF}} = 23$  Hz,  ${}^4J_{\text{FF}} = 8$  Hz *m*- $\text{C}_6\text{F}_5$ ).  ${}^{31}\text{P}\{{}^1\text{H}\}$  NMR ( $\text{CD}_2\text{Cl}_2$ ):  $\delta$  67.26 (s). Anal. Calcd for  $\text{C}_{30}\text{H}_{32}\text{BF}_{10}\text{N}_2\text{OP}$ : C, 53.83; H, 4.97; N, 4.18. Found: C, 54.06; H, 4.94; N, 4.27 %.

**Thermolysis of  ${}^t\text{Bu}_3\text{P}(\text{N}_2\text{O})\text{B}(\text{C}_6\text{F}_5)_3$  (**1**) to give  $({}^t\text{Bu}_3\text{P}=\text{O})\text{B}(\text{C}_6\text{F}_5)_3$  (**3**).** A solution of **1** (9 mg, 12  $\mu\text{mol}$ ; 0.5 mL of  $\text{C}_6\text{D}_5\text{Br}$ ) was heated in a J. Young NMR tube to 135 °C for 44h. NMR spectroscopy showed 95% conversion to one major product ( $\sim 80\%$  pure based on  ${}^{31}\text{P}$  NMR integration) which was identified as **3** (the minor products have not been identified). Thermolysis using **1- ${}^{15}\text{N}$**  results in an identical product that shows no  ${}^{15}\text{N}$  NMR resonances or  ${}^{31}\text{P}$ ,  ${}^{15}\text{N}$  coupling, consistent with  ${}^{15}\text{N}_2$  loss. The spectral data are identical to those obtained from an equimolar mixture of  ${}^t\text{Bu}_3\text{P}=\text{O}$  and  $\text{B}(\text{C}_6\text{F}_5)_3$  in  $\text{C}_6\text{D}_5\text{Br}$ .  ${}^1\text{H}$  NMR (400 MHz,  $\text{C}_6\text{D}_5\text{Br}$ , 25 °C)  $\delta$  0.99 (d,  $J_{\text{PH}} = 14.4$ ).  ${}^{31}\text{P}\{{}^1\text{H}\}$  NMR (162 MHz,  $\text{C}_6\text{D}_5\text{Br}$ , 25 °C)  $\delta$  93.5 (br s).  ${}^{19}\text{F}$  NMR (377 MHz,  $\text{CD}_2\text{Cl}_2$ , 25 °C)  $\delta$  -127.2 (br, 2F, *o*-F), -155.5 (br, 1F, *p*-F), -163.4 (2F, *m*-F).  ${}^{11}\text{B}$  NMR (128 MHz,  $\text{C}_6\text{D}_5\text{Br}$ , 25 °C)  $\delta$  4.5

**Photolysis of  ${}^t\text{Bu}_3\text{P}(\text{N}_2\text{O})\text{B}(\text{C}_6\text{F}_5)_3$  (**1**) to give  $({}^t\text{Bu}_3\text{P}=\text{O})\text{B}(\text{C}_6\text{F}_5)_3$  (**3**).** A solution of **1** (9 mg, 12  $\mu\text{mol}$ ; 0.5 mL of  $\text{C}_6\text{D}_5\text{Br}$ ) in a J. Young NMR tube was irradiated for 5 minutes at room temperature using a water-cooled quartz mercury arc lamp. NMR spectroscopy indicated 90% conversion to **3** ( $\sim 75\%$  pure based on  ${}^{31}\text{P}$  NMR integration). Prolonged photolysis ( $> 30$  min) resulted in decomposition of **3** to unidentified species. NMR data: see above.

**Computational Studies.** Calculations were performed with the Gaussian03 program using density functional theory (DFT).<sup>4</sup> The geometry of **1**,  $t\text{Bu}_3\text{P}$ ,  $t\text{Bu}_3\text{P}=\text{O}$ ,  $\text{B}(\text{C}_6\text{F}_5)_3$  and  $\text{N}_2\text{O}$  were optimized (for **1**: starting from the X-ray structure) at the B3LYP/6-31G(d) level without (symmetry) constraints, and the resulting structures were confirmed to be minima on the potential energy surface by frequency calculations (number of imaginary frequencies = 0). The relative energies reported in the text are electronic energies.

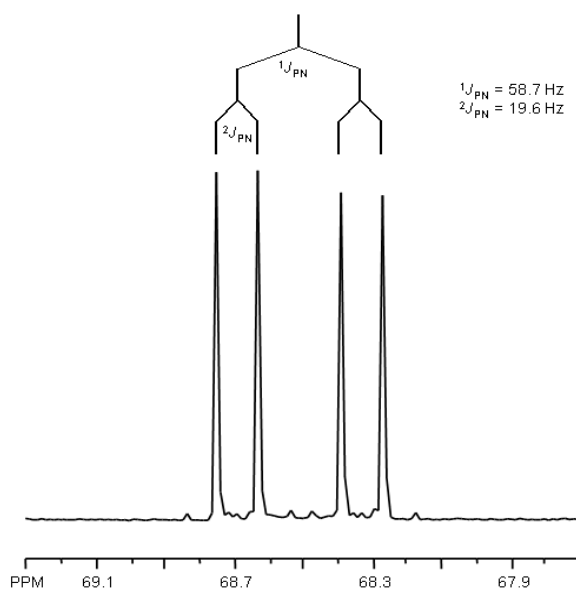

**Figure S1.**  $^{31}\text{P}\{^1\text{H}\}$  NMR spectrum of **1**- $^{15}\text{N}$ .

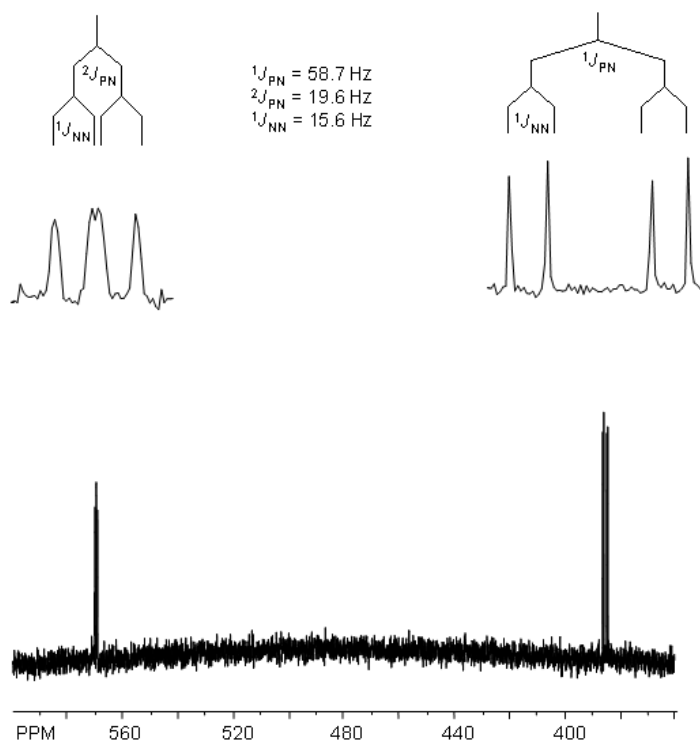

**Figure S2.**  $^{15}\text{N}$  NMR spectrum of **1**- $^{15}\text{N}$ .

## References

1. Deck, P. A.; Beswick, C. L.; Marks, T. J., *J. Am. Chem. Soc.* **1998**, *120*, 1772.
2. Schmidbaur, H.; Blaschke, G., *Z. Naturforsch. B.* **1978**, *33*, 1556.
3. Martin, G. E.; Hadden, C. E., *J. Nat. Prod.* **2000**, *63*, 543.
4. Gaussian 03, Revision E.01, Frisch, M. J.; Trucks, G. W.; Schlegel, H. B.; Scuseria, G. E.; Robb, M. A.; Cheeseman, J. R.; Montgomery, Jr., J. A.; Vreven, T.; Kudin, K. N.; Burant, J. C.; Millam, J. M.; Iyengar, S. S.; Tomasi, J.; Barone, V.; Mennucci, B.; Cossi, M.; Scalmani, G.; Rega, N.; Petersson, G. A.; Nakatsuji, H.; Hada, M.; Ehara, M.; Toyota, K.; Fukuda, R.; Hasegawa, J.; Ishida, M.; Nakajima, T.; Honda, Y.; Kitao, O.; Nakai, H.; Klene, M.; Li, X.; Knox, J. E.; Hratchian, H. P.; Cross, J. B.; Bakken, V.; Adamo, C.; Jaramillo, J.; Gomperts, R.; Stratmann, R. E.; Yazyev, O.; Austin, A. J.; Cammi, R.; Pomelli, C.; Ochterski, J. W.; Ayala, P. Y.; Morokuma, K.; Voth, G. A.; Salvador, P.; Dannenberg, J. J.; Zakrzewski, V. G.; Dapprich, S.; Daniels, A. D.; Strain, M. C.; Farkas, O.; Malick, D. K.; Rabuck, A. D.; Raghavachari, K.; Foresman, J. B.; Ortiz, J. V.; Cui, Q.; Baboul, A. G.; Clifford, S.; Cioslowski, J.; Stefanov, B. B.; Liu, G.; Liashenko, A.; Piskorz, P.; Komaromi, I.; Martin, R. L.; Fox, D. J.; Keith, T.; Al-Laham, M. A.; Peng, C. Y.; Nanayakkara, A.; Challacombe, M.; Gill, P. M. W.; Johnson, B.; Chen, W.; Wong, M. W.; Gonzalez, C.; Pople, J. A.; Gaussian, Inc., Wallingford CT, 2004.
